# Supplementary material for: Profiling and Cellular Analyses of Obesity-Related circRNAs in Neurons and Glia under Obesity-like In Vitro Conditions
Source: Int J Mol Sci. 2023 Mar 25;24(7):6235. doi: 10.3390/ijms24076235 (PMC10094513; doi:10.3390/ijms24076235)
Supplement: Supplementary file 1 [file ijms-24-06235-s001.zip]

Archive with 15 entries (15 files):
- supplementary files/Supplementary Figure 1.jpg
- supplementary files/Supplementary Figure 10.jpg
- supplementary files/Supplementary Figure 11.jpg
- supplementary files/Supplementary Figure 12.jpg
- supplementary files/Supplementary Figure 13.jpg
- supplementary files/Supplementary Figure 2.jpg
- supplementary files/Supplementary Figure 3.jpg
- supplementary files/Supplementary Figure 4.jpg
- supplementary files/Supplementary Figure 5.jpg
- supplementary files/Supplementary Figure 6.jpg
- supplementary files/Supplementary Figure 7.jpg
- supplementary files/Supplementary Figure 8.jpg
- supplementary files/Supplementary Figure 9.jpg
- supplementary files/Supplementary Figure Legends-revised.pdf
- supplementary files/Supplementary table 1.xlsx
