# Supplementary material for: Profiling and Cellular Analyses of Obesity-Related circRNAs in Neurons and Glia under Obesity-like In Vitro Conditions
Source: Int J Mol Sci. 2023 Mar 25;24(7):6235. doi: 10.3390/ijms24076235 (PMC10094513; doi:10.3390/ijms24076235)
Supplement: Supplementary file 1 [file ijms-24-06235-s001.zip › supplementary files/Supplementary table 1.xlsx]

## Sheet: circRNA primer (mouse)
	circRNA primers (mouse)
	Gene name	sequence
	circGnptg	Fw	CAGTCATCCACATGCCCTTGAAGG
		Rev	AGGACCTGGCAGACGAACTGATC
	circBcl2l13	Fw	CTTATTCCATCCGCTGGCATGGAC
		Rev	GTGGTCAAGAGCCTTTGCGTATGC
	circMyrip	Fw	ACTCTGCGATCAACTCCTCGGTAG
		Rev	ACTATAGACACGTCGAGGCAGCAG
	circKcnq2	Fw	CCTCAGAGCTCTTCTCGTACTCCT
		Rev	CTCATCCTGGCCTCATTTCTGGTG
	circSnx12	Fw	CTCAAAGTCACTATAGCGTCGCCG
		Rev	CACTGGCTCAGAATGAACGCTGTC
	circStx6	Fw	CCTGAAGGAGCTCTGTCCATCTCT
		Rev	TCTCACGAGTTGGAGAGCACTCAG
	circFaxc	Fw	TTGTCCCTGGTAAGGTCCACATCG
		Rev	AGACACGGATTTCACCGGACACTC
	circKmt2a	Fw	ATTAGAGGAGGCTGCTCAGTGTGG
		Rev	ATTAGAGGAGGCTGCTCAGTGTGG
	circMap2k4	Fw	TCGAACGAGGTAGACATGAGCTCC
		Rev	GCTCTGTGATTTCGGCATCAGTGG
	circTbc1d14	Fw	TCCTCACATTCTGCTTGGGAGAGG
		Rev	AAGGTTCGAGACTTGTGGTGGCAG
	circRabgef1	Fw	GCACAGGAGCTCAGATTGATCCAC
		Rev	CTCCAAGTTCGAGGAGAAGAAGACC
	circDennd1b	Fw	AAACAGAACTTGGGCACGCTCTGC
		Rev	ACTGTACGCCAGCATGCTGCATGA
	circAftph	Fw	ATCCTCTGCTCCGTTGTCTAGAGG
		Rev	TCTGGCAGTCACAGAGGACAGATG
	circZzz3	Fw	CCATGTCACACTGAGACTTCAGG
		Rev	CAAAGAGAGTGCCAGTCAGCACA
	circAkap6	Fw	TTCCAGGGCATCCTCACTCATTCC
		Rev	AAAGGCAAGGCTGCACTGTATCC
	circPan3	Fw	AGGACTCTGTGAGACTCGCATCAG
		Rev	AATGACTTCGGTGCCCTCAACATC
	circNsd2	Fw	TCCATCCAGCCTAGATCCTTTGG
		Rev	TGTCTGATGCTTGCAAACCACTG
	circEprs	Fw	GAGCAGCAATGAACTGCTTCAGCC
		Rev	ACTTGGCTTGCTGAGAGCACACAC
	circFut8	Fw	ACCACATGGTATTGCAGAGA
		Rev	CTTGCAAAGCTTGAACGCTT
	circUsp3	Fw	CCACAGTGGACACTTGAACAAGTC
		Rev	GACACTGTGTGCTTTATGGCAAGG

## Sheet: circRNA primer (human)
	circRNA primers (Human)
	Gene name	sequence
	circMYRIP	Fw	ATCCTGCTATCAACTCCTCTGTG
		Rev	ACCATAGATACATCAAGGCAGCAA
	circFAXC	Fw	GTCCCTGGTAAGGTCCACATTG
		Rev	CCAGACACAGATTTTACTGGACACT
	circEPRS	Fw	GAGCAGCAATAAACTGTTTCAGTCC
		Rev	CTTGGCTTGCAGAGACTACACAT
	circSTX6	Fw	CCTGGAGGAGCTCTGTCCATCTC
		Rev	CTCTCACGAATTGGAGAGCACTCAG
	circSNX12	Fw	CTCAAAGTCACTGTAGCGCCGCC
		Rev	CACTGGCTCAGAATGAACGCTGCC
	circGNPTG	Fw	CCCTCATCCACATGCCCGTGAAG
		Rev	AGGACCTGGCCGATGAGCTGATC
	circUSP3	Fw	CCACAGTGGACACTTGAACAAGTC
		Rev	GACACTCTGTGCTTTATGGCAAGG
	circDENND1B	Fw	AAACAGAACTTTGGCACACTCTGT
		Rev	GCTGTATGCCAGTATGCTGCAT
	circAFTPH	Fw	ATCCTCTGCTCCATTGTCTAATGG
		Rev	CCTGGCAGTCACATAGGACAG
	circZZZ3	Fw	CCATGTTACACTGAGACTTCAGG
		Rev	CAAAGAGAGTGCCAGTCAGC
	circRABGEF1	Fw	GCACAGGAGATCCGATTGAT
		Rev	CTCCAAGTTTGAAGAAAAGAAAACC

## Sheet: mRNA primer (mouse)
		mRNA primers (mouse) - circRNA host gene				mRNA primers (mouse) - gene related to obesity-like condition model
		Gene name	sequence			Gene name	sequence		Gene name	sequence		Gene name	sequence
		Snx12	Fw	GATCCTGACTCCATCTTGTACTG		Insr	Fw	AGATGACAACGAGGAATGTGG	Syp	Fw	ACATGCAAGGAACTGAGGGA	B2m	Fw	GGTCGCTTCAGTCGTCAG
			Rev	TCCTTGGATTACACTGGCTG			Rev	TGACTTACAGATGGTTGGGC		Rev	CCAGGTTCAGGAAGCCAAAC		Rev	TTCAGTATGTTCGGCTTCCC
		Rabgef1	Fw	CAAGAGGACTGGGAACTGG		Irs1	Fw	ATAGCGTAACTGGACATCACAG	Il1r1	Fw	TCATCCTCACGGCTACAATTG	H2-Ea	Fw	GTTTGACTTTGACGGCGATG
			Rev	CTTTTCGGGTTTTCTCATTGGT			Rev	GCATCGTACCATCTACTGAAGAG		Rev	GCATCGTATGTCTTTCCATCTG		Rev	TCCAGGTTAGCTTTGTCCAC
		Dennd1b	Fw	CTACCCGATGTACTGGCAAC		Rps6kb1	Fw	AAACTAGTGTGAACAGAGGGC	Il1rap	Fw	AGAAAGATGTGCTCTGGTTCC	Pcx	Fw	GAGCTTATCCCGAACATCCC
			Rev	ACACAACCACATCTTCCAATGA			Rev	ATCTTCCCAGTATTTGCTCCTG		Rev	CTCATGGCAGAATTGAAACAGC		Rev	TCCATACCATTCTCTTTGGCC
		Zzz3	Fw	CCTGAAATACCCTCCCGAAG		Slc2a4	Fw	ACCCTCACTACGCTCTGG	Rest	Fw	TGAGAAACCATTTCCCCAGG	Pdk4	Fw	CCCGTTACCAATCAAAATCTTCAG
			Rev	TTCTGCCTGGAACTGGTATG			Rev	CAACACGGCCAAGACATTG		Rev	TGAGAGCTTGAGTAAGGACAAAG		Rev	ACAGTTTGGGTCGATACTTCC
		Stx6	Fw	GGACCCCTTCTTTGTAGTGAAG		Slc2a5	Fw	ATCACTGTCGGCATCCTTG	Bcl2	Fw	GATGACTGAGTACCTGAACCG	Gls	Fw	GTGGTTTCTGCCCAATTACTG
			Rev	AGATTGTTCCTCAGCTCGTTG			Rev	GCTCTCGGGAAAGAACGG		Rev	CAGAGACAGCCAGGAGAAATC		Rev	CCCAGCAACTCCAGATTTTG
		Aftph	Fw	ATTTTCGAAGCCTGTTTTCCG		Slc2a1	Fw	GATTGGTTCCTTCTCTGTCGG	Bcl2l1	Fw	GGAAAGCGTAGACAAGGAGATG	Slc1a3	Fw	TCCTCTACTTCCTGGTAACCC
			Rev	TCCATACACCCCTCAACTCA			Rev	CCCAGGATCAGCATCTCAAAG		Rev	GCATTGTTCCCGTAGAGATCC		Rev	TCCACACCATTGTTCTCTTCC
		Usp3	Fw	TTCCCGCTCAGCAATTCTAC		Traf2	Fw	GCAGTGGCCTTTTAATCAGAAG	Il6ra	Fw	TGCAGTTCCAGCTTCGATAC	Vamp2	Fw	GCACCTCCTCCAAACCTTAC
			Rev	CTCGACTCTGTCCCACATATG			Rev	ACTGGCGATGTTCATGTCAC		Rev	TGGATGACGCATTGGTACTG		Rev	ATCCAGCTCCGACAACTTC
		Gnptg	Fw	TTTCCACAACGTCACCCAG		Tradd	Fw	GAGCCATACAGGTAGCTTCTG	Il6st	Fw	GAAACAAGGTGGGCAAATCAG	Vamp3	Fw	AGTGTCCTGGTGATCATTGTC
			Rev	CCCCATCAGTCATCCACATG			Rev	CTGGTCTTGAAGAGTCAGTGG		Rev	GGGTTTAGGTGGAGGTGTC		Rev	ATAACACGGCAGGTTCTAAGTAG
		Faxc	Fw	GCATCAGTTTGCAAGACCTAAC		Fadd	Fw	CGCCGACACGATCTACTG	Jak1	Fw	CGGCTTGTGAATACTCTGAAAG
			Rev	TCAATCCAAGGCATCTTCCC			Rev	GGCCAGTCTTTTCCAGTCTC		Rev	AGTTGTCCGGTTAGATGGTTG
		Fut8	Fw	GTGGATGGGAGACTGTGTTTAG		Tnfrsf1a	Fw	GCAGGGAGTGTGAAAAGGG	Tnf	Fw	CTCATGCACCACCATCAAGG
			Rev	CGAGGATGGAGGCTGTCTAC			Rev	GGTTCTCCTTACAGCCACAC		Rev	ACCTGACCACTCTCCCTTTG
		Dennd1b	Fw	CTACCCGATGTACTGGCAAC		Ffar1	Fw	GTTTCATAAACCCGGACCTAGG	Il1b	Fw	ACTCATTGTGGCTGTGGAGA
			Rev	ACACAACCACATCTTCCAATGA			Rev	CATATTGTTCCCCGTCCAGG		Rev	AGCCTGTAGTGCAGTTGTCT
		Eprs	Fw	CACCAGGAGAAAAGCAGTTTG		Ffar4	Fw	TTTTGTGACTTTGAACTTCCTGG	Il6	Fw	ACTTCACAAGTCCGGAGAGG
			Rev	CCACAGGGAATGACTACCAC			Rev	GTTGGGACACTCGGATCTG		Rev	TGCAAGTGCATCATCGTTGT
		Aftph	Fw	ATTTTCGAAGCCTGTTTTCCG		Ppara	Fw	GTACTGCCGTTTTCACAAGTG	Ptgs2	Fw	AAGCCTTCTCCAACCTCTCC
			Rev	TCCATACACCCCTCAACTCA			Rev	TCTTTCAGGTCGTGTTCACAG		Rev	GCTGGGCAAAGAATGCAAAC
		Gapdh	Fw	AATGTGTCCGTCGTGGATCT		Pgc1a	Fw	TGCTGTGTGTCAGAGTGGAT	Nos2	Fw	ATGCGAAAGGTCATGGCTTC
			Rev	AGACAACCTGGTCCTCAGTG			Rev	TACAGAGTCTTGGCTGCACA		Rev	CCCAAATGTGCTTGTCACCA
						Map2	Fw	TTCCACCGAGCAGTCTTTCT	Msr1	Fw	AACATCACCAACGACCTCAG
							Rev	CCCAAGGTCTTGGAGGTCAT		Rev	ACCAGTTTGTCCAGTAAGCC
						Stx1a	Fw	TTTGTGGAGGTCATGTCCGA	Cd36	Fw	GATGACGTGGCAAAGAACAG
							Rev	AATTCCTCACTGGTCGTGGT		Rev	CATTGGGCTGTACAAAAGACAC

## Sheet: circRNA siRNA (mouse)
	circRNA siRNAs (mouse)
	siRNA name	Starting position	Sense sequence	AntiSense sequence	Starting position	Sense sequence	AntiSense sequence
	sicircSnx12	SP5 (#1)	GGGACCCUUCUGUUUGGAU	AUCCAAACAGAAGGGUCCCug	SP10 (#2)	CCUUCUGUUUGGAUGGGUA	UACCCAUCCAAACAGAAGGgu
	sicircStx6	SP6 (#1)	ACAUGACCAGUGAGAGGUA	UACCUCUCACUGGUCAUGUga	SP16 (#2)	CCAGUGAGAGGUACAGAAA	UUUCUGUACCUCUCACUGGuc
	sicircRabgef1	SP8 (#1)	UCCAAGAAGGGAAGAAGAU	AUCUUCUUCCCUUCUUGGAuc	SP13 (#2)	CAAGAAGGGAAGAAGAUGU	UCAUCUUCUUCCCUUCUUGga
	sicircDennd1b	SP9 (#1)	CAAAUUAAGCACUGAAGUU	AACUUCAGUGCUUAAUUUGcu	SP14 (#2)	GCACUGAAGUUCUGCAGAG	CUCUGCAGAACUUCAGUGCuu
	sicircAftph	SP6 (#1)	CGUGAAGUCAAGUCCGUAU	AUACGGACUUGACUUCACGga	SP14 (#2)	CAAGUCCGUAUUUGAUUGU	UCAAUCAAAUACGGACUUGac
	sicircZzz3	SP6 (#1)	GAAACACAACAAAGAAUAA	UUAUUCUUUGUUGUGUUUCag	SP12 (#2)	CAACAAAGAAUAACAAGUU	AACUUGUUAUUCUUUGUUGug
	sicircUsp3	SP7 (#1)	GAUUGAAAUCACACGUCCU	UGGACGUGUGAUUUCAAUCcg	SP16 (#2)	GAAAUCACACGUCCAGGUU	AACCUGGACGUGUGAUUUCaa
